# Supplementary material for: Comprehensive mapping of the human papillomavirus (HPV) DNA integration sites in cervical carcinomas by HPV capture technology
Source: PubMed Central journal article supplement (PMC4868726; doi:10.18632/oncotarget.6809), 2015-12-31
Supplement: oncotarget-07-5852-s001.pdf [file oncotarget-07-5852-s001.pdf]

## Comprehensive mapping of the human papillomavirus (HPV) DNA integration sites in cervical carcinomas by HPV capture technology

### Supplementary Materials

**Supplementary Table S1: Summary of 49 cancer samples analyzed in this study: HPV viral status and clinical information**

| Sample name       | Age (years) | HPV status      | Sequencing depth | N of validated integration sites on the basis of different reads |       |     |      |      | Status of radiotherapy and chemotherapy | Clinical stage | Pathology               |
|-------------------|-------------|-----------------|------------------|------------------------------------------------------------------|-------|-----|------|------|-----------------------------------------|----------------|-------------------------|
|                   |             |                 |                  | Total                                                            | > 3   | 3   | 2    | 1    |                                         |                |                         |
| T1                | 54          | Negative        |                  |                                                                  |       |     |      |      | Yes                                     | IIIb           | squamous cell carcinoma |
| T2                | 43          | Negative        |                  |                                                                  |       |     |      |      | Yes                                     | IIB            | squamous cell carcinoma |
| T6                | 40          | Negative        |                  |                                                                  |       |     |      |      | No                                      | Ib             | squamous cell carcinoma |
| T7                | 51          | Negative        |                  |                                                                  |       |     |      |      | No                                      | Ila            | squamous cell carcinoma |
| T12               | 55          | Negative        |                  |                                                                  |       |     |      |      | Yes                                     | IIIb           | squamous cell carcinoma |
| T14               | 61          | Negative        |                  |                                                                  |       |     |      |      | Yes                                     | IIIb           | adenocarcinoma          |
| T27               | 68          | Negative        |                  |                                                                  |       |     |      |      | No                                      | IIB            | squamous cell carcinoma |
| T46               | 32          | Negative        |                  |                                                                  |       |     |      |      | No                                      | Ia             | squamous cell carcinoma |
| T3                | 41          | HPV16           | 128              |                                                                  |       |     |      |      | Yes                                     | IIB            | squamous cell carcinoma |
| T5                | 59          | HPV16           | 15               |                                                                  |       |     |      |      | Yes                                     | Ia             | squamous cell carcinoma |
| T10               | 59          | HPV16           | 12               |                                                                  |       |     |      |      | No                                      | IIIb           | adenocarcinoma          |
| T21               | 51          | HPV16           | 12               |                                                                  |       |     |      |      | No                                      | IIIb           | adenocarcinoma          |
| T26               | 54          | HPV16           | 62               |                                                                  |       |     |      |      | No                                      | IIB            | squamous cell carcinoma |
| T28               | 36          | HPV16           | 150              |                                                                  |       |     |      |      | Yes                                     | IIB            | squamous cell carcinoma |
| T29               | 45          | HPV16           | 159              |                                                                  |       |     |      |      | Yes                                     | IIB            | squamous cell carcinoma |
| T37               | 45          | HPV16           | 52               |                                                                  |       |     |      |      | Yes                                     | Ia             | squamous cell carcinoma |
| T40               | 55          | HPV16           | 16               |                                                                  |       |     |      |      | Yes                                     | IIIb           | squamous cell carcinoma |
| T41               | 44          | HPV16           | 112              |                                                                  |       |     |      |      | Yes                                     | IIIb           | squamous cell carcinoma |
| T45               | 52          | HPV16           | 20               |                                                                  |       |     |      |      | Yes                                     | Ia             | squamous cell carcinoma |
| T15               | 44          | HPV16           | 338              | 1/1                                                              | 1/1   |     |      |      | No                                      | Ib             | adenosquamous carcinoma |
| T18               | 54          | HPV16           | 454              | 1/1                                                              | 1/1   |     |      |      | No                                      | IIB            | squamous cell carcinoma |
| T25               | 36          | HPV16           | 271              | 1/1                                                              | 1/1   |     |      |      | No                                      | IIIb           | squamous cell carcinoma |
| T32               | 35          | HPV16           | 157              | 1/1                                                              | 1/1   |     |      |      | No                                      | IIIb           | squamous cell carcinoma |
| T16               | 60          | HPV16           | 834              | 1/3                                                              | 1/2   |     |      | 0/1  | No                                      | IIIb           | squamous cell carcinoma |
| T8                | 40          | HPV16           | 15               | 1/5                                                              |       | 0/1 | 1/3  | 0/1  | No                                      | Ila            | squamous cell carcinoma |
| T20               | 41          | HPV16           | 1511             | 2/2                                                              | 2/2   |     |      |      | No                                      | Ia             | squamous cell carcinoma |
| T39               | 57          | HPV16           | 120              | 2/2                                                              | 2/2   |     |      |      | No                                      | IIIb           | squamous cell carcinoma |
| T4                | 48          | HPV16           | 15               | 2/3                                                              | 2/2   |     |      | 0/1  | Yes                                     | IIB            | squamous cell carcinoma |
| T17               | 41          | HPV16           | 11412            | 3/14                                                             | 2/2   |     | 0/2  | 1/10 | No                                      | Ila            | squamous cell carcinoma |
| T36               | 29          | HPV16           | 1689             | 3/3                                                              | 2/2   |     | 1/1  |      | No                                      | Ia             | squamous cell carcinoma |
| T33               | 46          | HPV16           | 6384             | 4/13                                                             | 3/3   |     | 1/1  | 0/9  | No                                      | Ia             | squamous cell carcinoma |
| T47               | 59          | HPV16           | 10815            | 4/22                                                             | 2/3   |     | 2/3  | 0/16 | No                                      | IIIb           | squamous cell carcinoma |
| T43               | 47          | HPV16           | 353              | 4/4                                                              | 3/3   |     | 1/1  |      | No                                      | Ib             | squamous cell carcinoma |
| T35 <sup>a)</sup> | 71          | HPV16 and HPV18 | 5524 and 160     | 8/26                                                             | 6/7   | 1/1 | 1/2  | 0/16 | No                                      | IIIb           | squamous cell carcinoma |
| T38               | 62          | HPV16           | 8377             | 12/38                                                            | 6/8   | 2/2 | 1/3  | 3/25 | No                                      | IIIb           | squamous cell carcinoma |
| T42               | 81          | HPV16           | 6349             | 14/39                                                            | 9/13  | 0/3 | 4/10 | 1/13 | No                                      | IIIb           | squamous cell carcinoma |
| T34               | 81          | HPV16           | 7731             | 16/39                                                            | 8/12  | 1/1 | 6/13 | 1/13 | No                                      | IIIb           | squamous cell carcinoma |
| T23               | 56          | HPV16           | 10220            | 19/31                                                            | 16/19 | 0/1 | 3/4  | 0/7  | No                                      | IIIb           | squamous cell carcinoma |
| T31               | 48          | HPV18           | 77               | 1/2                                                              | 1/2   |     |      |      | No                                      | IIIb           | squamous cell carcinoma |
| T44               | 47          | HPV18           | 69               | 1/1                                                              | 1/1   |     |      |      | No                                      | IIIb           | squamous cell carcinoma |

|                  |    |                 |            |      |     |  |     |      |     |      |                         |
|------------------|----|-----------------|------------|------|-----|--|-----|------|-----|------|-------------------------|
| T9 <sup>b)</sup> | 39 | HPV18 and HPV58 | 380 and 29 | 1/1  | 1/1 |  |     |      | Yes | IIIb | adenosquamous carcinoma |
| T11              | 56 | HPV58           | 2979       | 9/59 | 8/8 |  | 1/3 | 0/48 | Yes | IIIb | squamous cell carcinoma |
| T19              | 52 | HPV58           | 2676       |      |     |  |     |      | No  | IIb  | squamous cell carcinoma |
| T24              | 33 | HPV58           | 556        |      |     |  |     |      | No  | Ia   | squamous cell carcinoma |
| T30              | 38 | HPV58           | 11         |      |     |  |     |      | Yes | IIb  | squamous cell carcinoma |
| T22              | 53 | HPV31           | 79         |      |     |  |     |      | No  | Ia   | squamous cell carcinoma |
| T13              | 64 | HPV45           | 60         |      |     |  |     |      | Yes | IIIb | squamous cell carcinoma |
| SiHa             |    | HPV16           | 228        | 2/2  | 2/2 |  |     |      |     |      |                         |
| HeLa             |    | HPV18           | 3259       | 4/6  | 4/4 |  |     | 0/2  |     |      |                         |

<sup>a)</sup>the sample of T35 harbors HPV16 and HPV18, and the sequencing depth of HPV16 is 34-fold greater than that of HPV18. So, only HPV16, a main type of HPV in sample of T35, is analyzed in subsequent HPV assay.

<sup>b)</sup>the sample of T9 harbors HPV18 and HPV58, and the sequencing depth of HPV18 is 13 fold greater than that of HPV58. So, only HPV18, a main type of HPV in sample of T9, is analyzed in subsequent HPV assay.

### Supplementary Table S2: HPV-cellular DNA junctions confirmed by PCR amplification and Sanger sequencing

### Supplementary Table S3: Correlation between HPV status and clinicopathological parameters

| Clinical Characteristics                          | N  | HPV DNA      |              | P     | HPV integration |           | P            |
|---------------------------------------------------|----|--------------|--------------|-------|-----------------|-----------|--------------|
|                                                   |    | Negative (%) | Positive (%) |       | No (%)          | Yes (%)   |              |
| <b>Age (year)</b>                                 |    |              |              |       |                 |           |              |
| < 50                                              | 23 | 3 (13.0)     | 20 (87.0)    | 0.701 | 10 (43.5)       | 13 (56.5) | 0.387        |
| > 50                                              | 24 | 5 (20.8)     | 19 (79.2)    |       | 14 (58.3)       | 10 (41.7) |              |
| <b>Stage</b>                                      |    |              |              |       |                 |           |              |
| I + II                                            | 25 | 5 (20.0)     | 20 (80.0)    | 0.706 | 16 (64.0)       | 9 (36.0)  | 0.082        |
| III                                               | 22 | 3 (13.6)     | 19 (86.4)    |       | 8 (36.4)        | 14 (63.6) |              |
| <b>Preoperative radiotherapy and chemotherapy</b> |    |              |              |       |                 |           |              |
| No                                                | 30 | 4 (13.3)     | 26 (86.7)    | 0.435 | 10 (33.3)       | 20 (66.7) | <b>0.002</b> |
| Yes                                               | 17 | 4 (23.5)     | 13 (76.5)    |       | 14 (82.4)       | 3 (17.6)  |              |

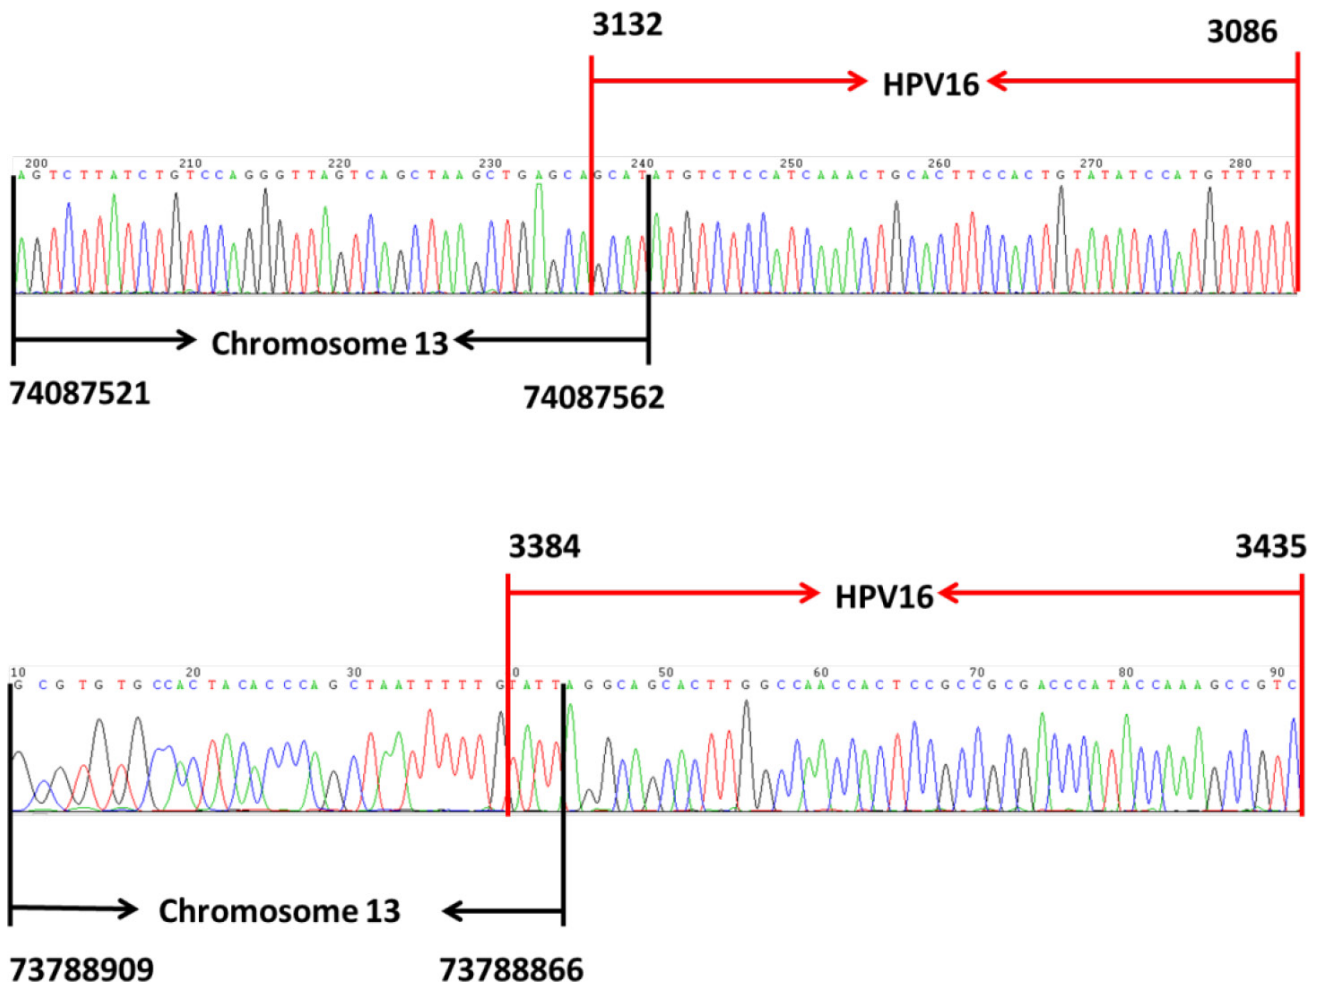

**Supplementary Figure S1: Sequence analysis of two viral-cellular junctions found in SiHa cells that resulted from human papillomavirus (HPV) 16 integration into human chromosome 13.** The sequence between two red lines belongs to HPV16, and the sequence between two black lines belongs to chromosome 13. Some nucleotides between red line (left) and black line (right) located in the middle are shared between both viral and cellular sequence. The number of sequences is annotated according to GenBank accession number NC\_001526.2 for HPV16 and Hg19 human reference genome.

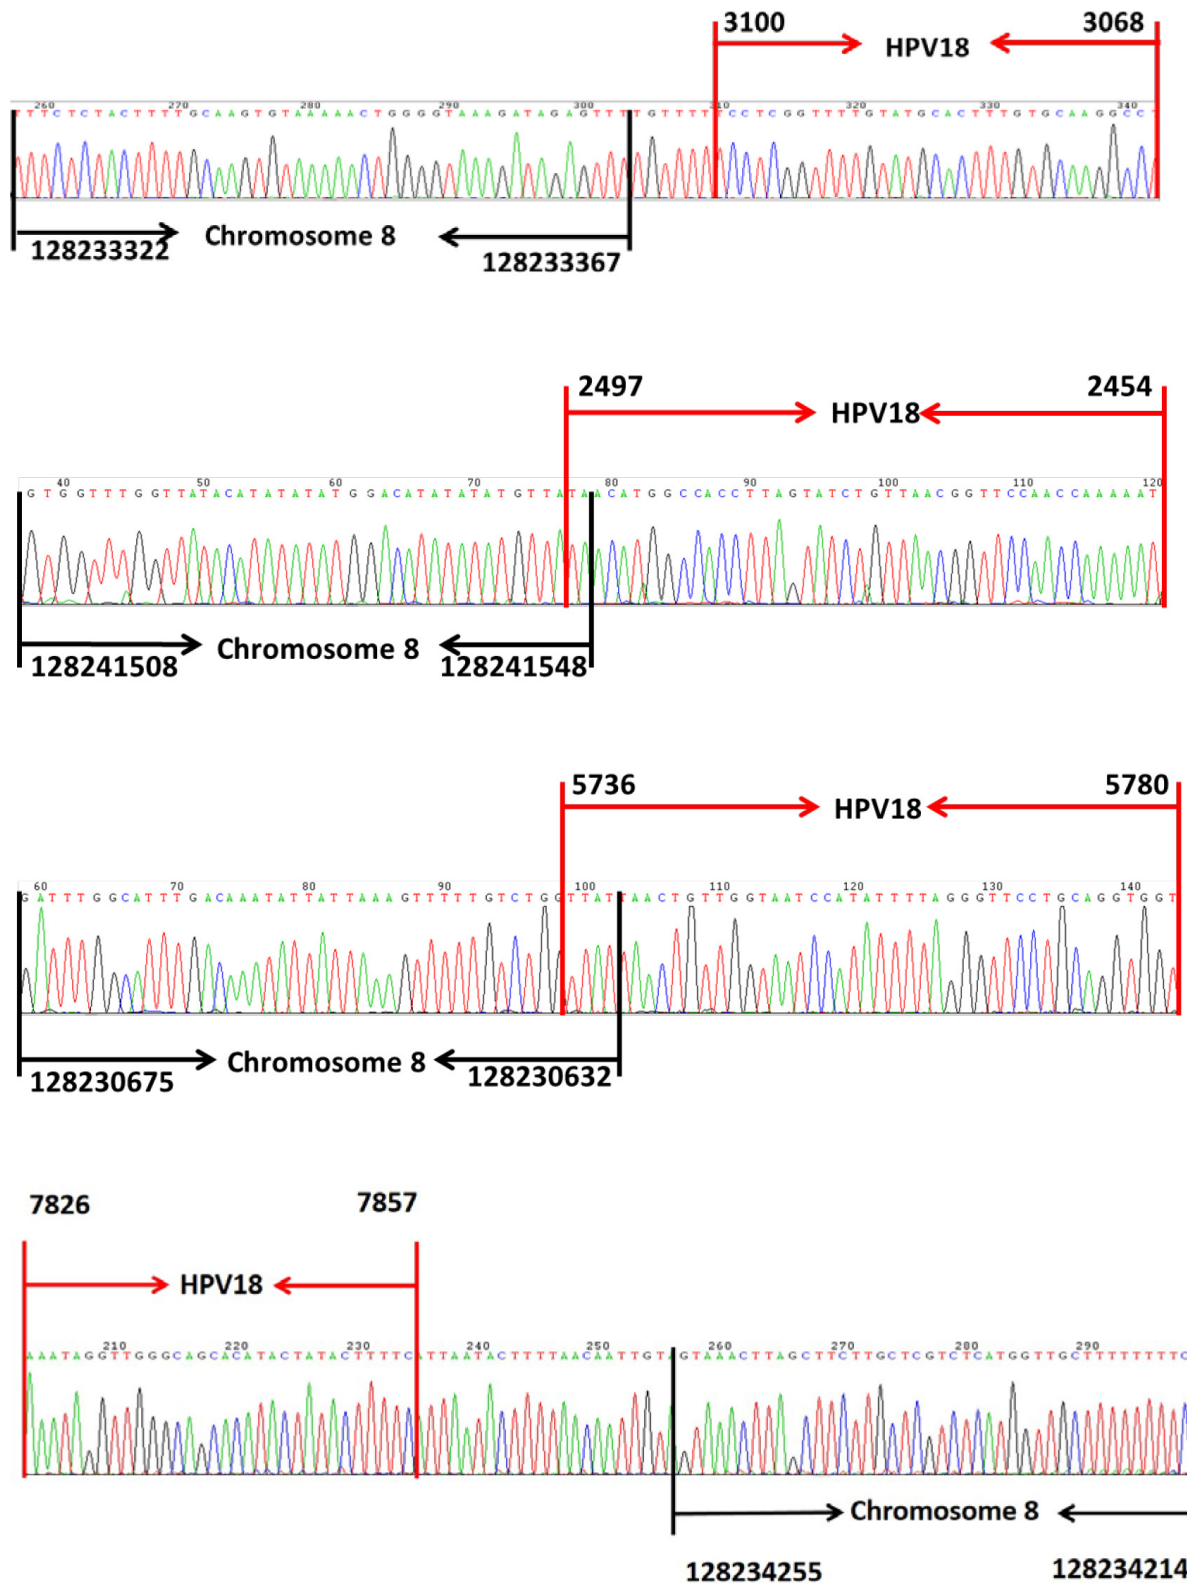

**Supplementary Figure S2: Sequence analysis of four viral-cellular junctions found in HeLa cells that resulted from human papillomavirus (HPV) 18 integration into human chromosome 8.** The sequence between two red lines belongs to HPV18, and the sequence between two black lines belongs to chromosome 8. There are two forms according to some nucleotides between red line and black line located in the middle. One is overlapping, defined by containing nucleotides shared between both viral and cellular sequence. The other is inserting some unaligned nucleotides, since these nucleotides were not assigned to a particular genomic sequence. The number of sequences is annotated according to GenBank accession number NC\_001357.1 for HPV18 and Hg19 human reference genome.
